# Supplementary material
Source: publisher figshare collection journal article supplement (https://acs.figshare.com/ndownloader/files/4147726)
Supplement: Supplementary file 1 [file 4147726]

# Partitioning behavior of petrodiesel/biodiesel blends in water — Supporting Information

*Mohamad H. Yassine<sup>†</sup>, Shuyun Wu<sup>†</sup>, Makram T. Suidan<sup>‡\*</sup>, and Albert D. Venosa<sup>§</sup>*

<sup>†</sup>Department of Environmental Engineering, School of Energy, Environmental, Biological, and Medical Engineering, University of Cincinnati, Ohio 45221

<sup>‡</sup> Faculty of Engineering and Architecture, American University of Beirut, P.O. Box 11-0236 Riad El-Solh, Beirut, Lebanon 1107 2020

<sup>§</sup>U.S. Environmental Protection Agency, 26 W. Martin Luther King Drive, Cincinnati, OH 45268

\*Corresponding author e-mail: [msuidan@aub.uc.edu.lb](mailto:msuidan@aub.uc.edu.lb)

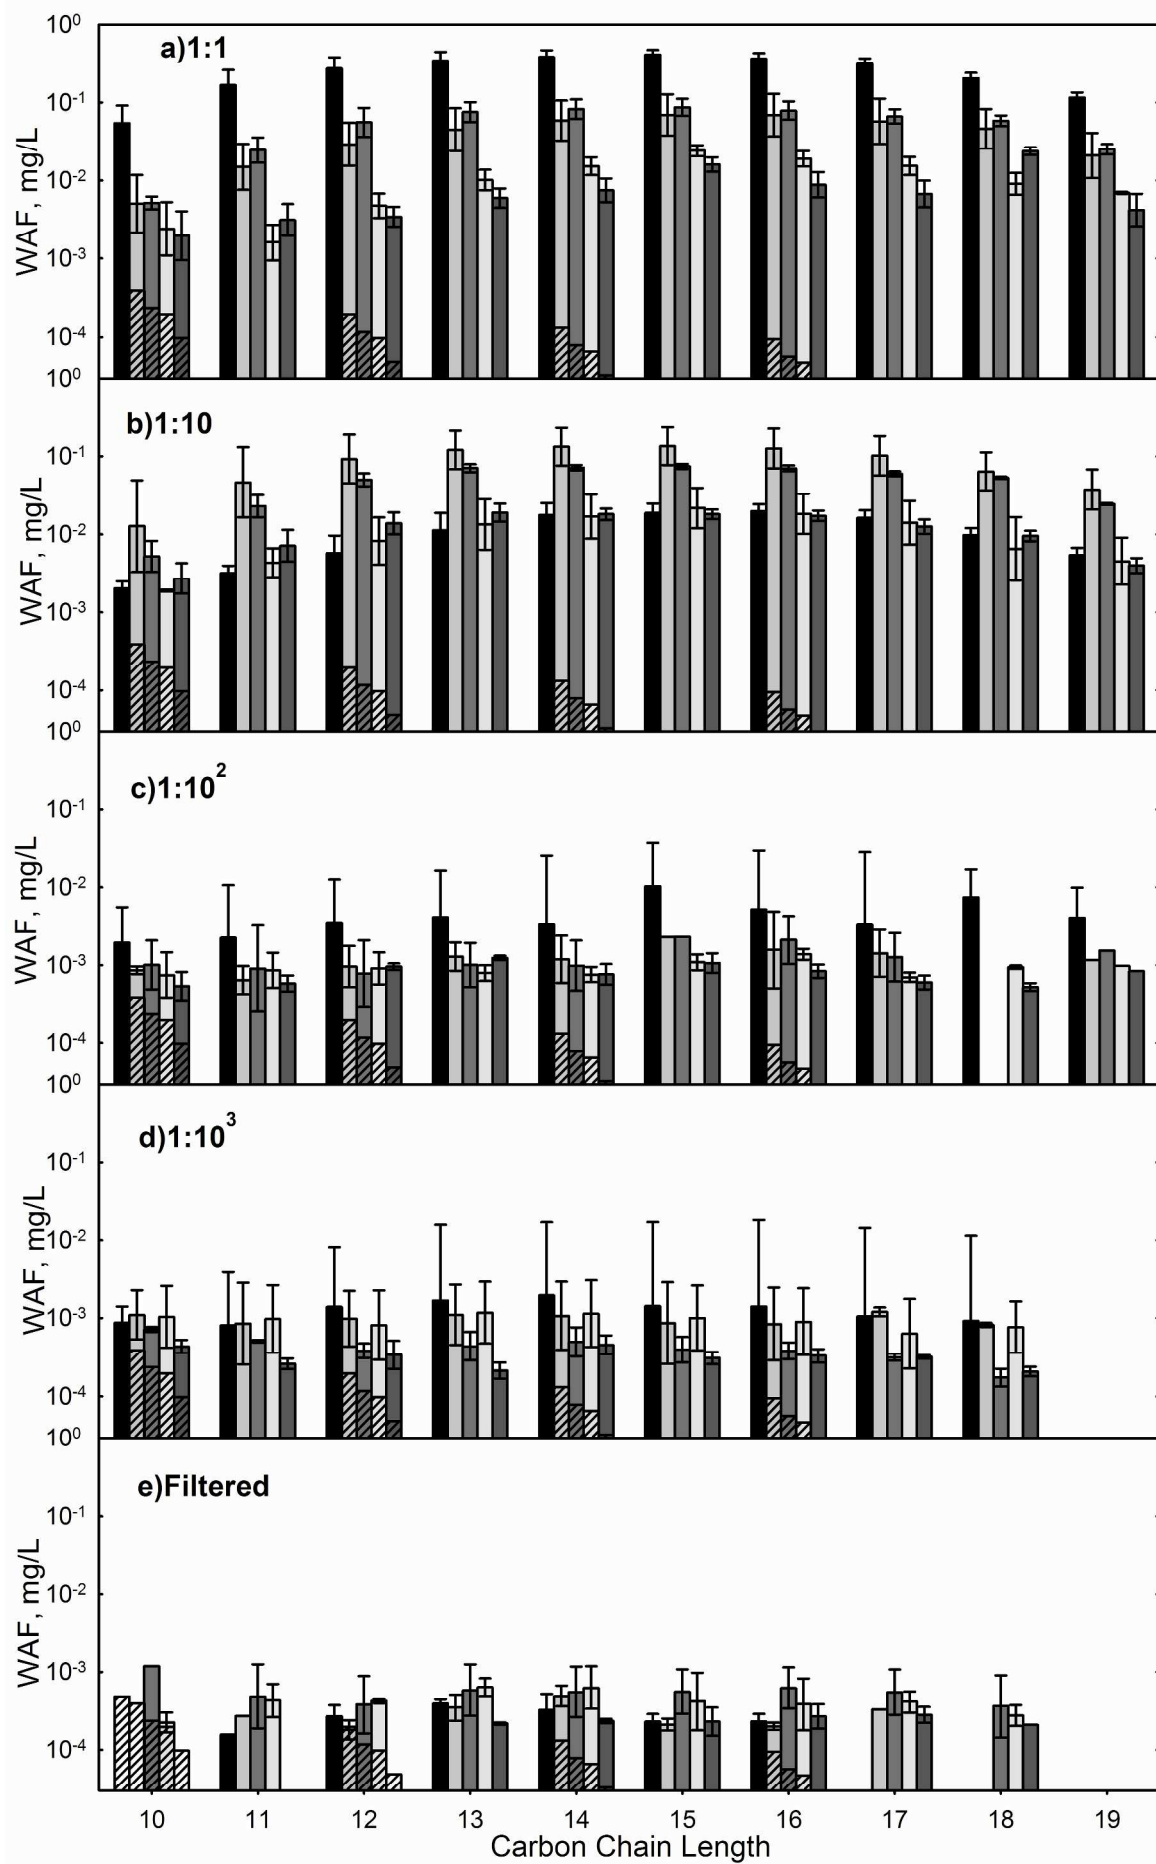

Figure S1. n-alkanes WAF concentrations in B0 (■), B20 (▨), B40 (▩), B60 (▤), B80 (▥), and  $S_{aq,WAF}^{sat}$  is n-alkanes concentrations calculated by Equation 1 using solubilities reported by Franks<sup>1</sup> (▧) ) at dilution levels: (a) 1:10<sup>0</sup>, (b) 1:10<sup>1</sup>, (c) 1:10<sup>2</sup>, (d) 1:10<sup>3</sup>, (e) and 1:10<sup>3</sup> filtered. Means and standard deviations are calculated geometrically (n = 3). Error bars are ± 1 geometric standard deviation. Not shown data were below detection limits.

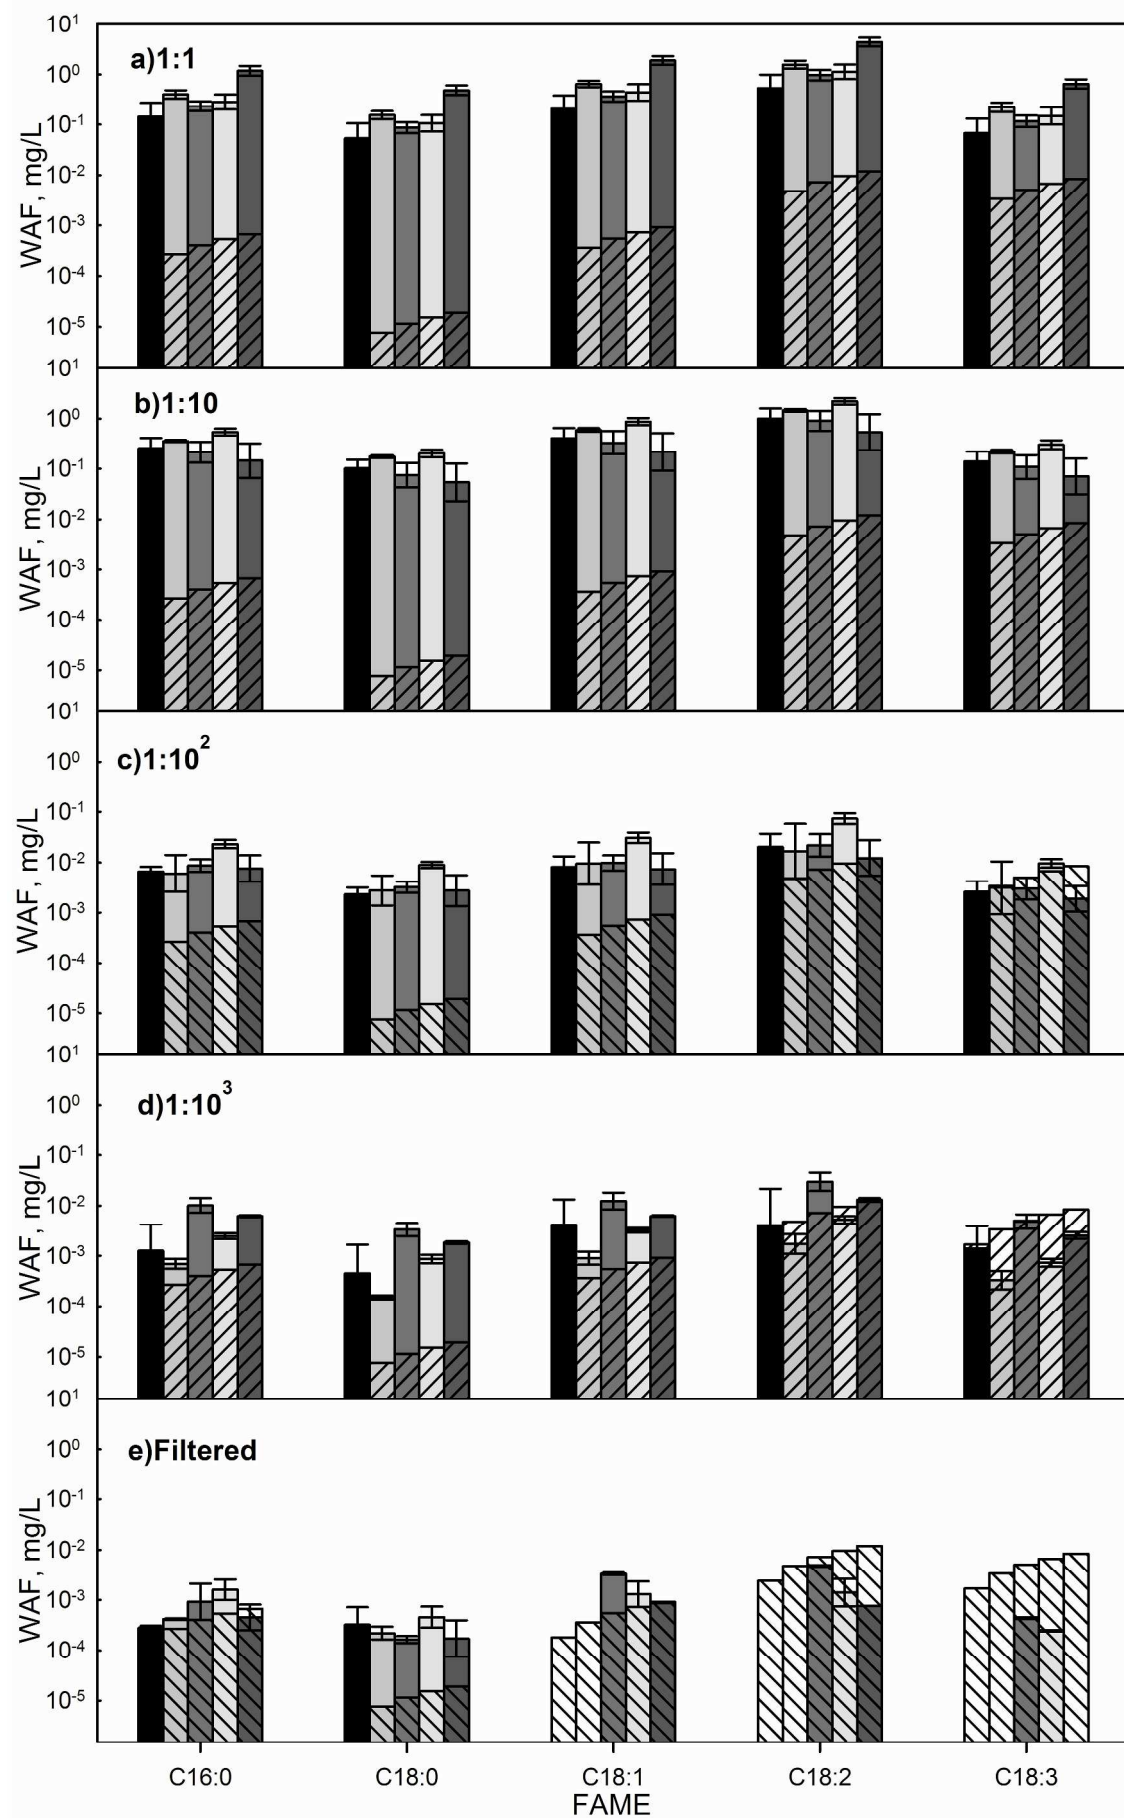

Figure S2. FAMES WAF concentrations in B20 (■), B40 (▤), B60 (▥), B80 (▦), B100 (▧), and  $S_{aq,WAF}^{sat}$  is FAMES concentrations calculated by Equation 1 using solubilities reported by Krop et al.<sup>2</sup> (▨) at dilution levels: (a) 1:10<sup>0</sup>, (b) 1:10<sup>1</sup>, (c) 1:10<sup>2</sup>, (d) 1:10<sup>3</sup>, (e) and 1:10<sup>3</sup> filtered. Means and standard deviations are calculated geometrically (n=3). Error bars are ± 1 geometric standard deviation. Not shown data were below detection limits.

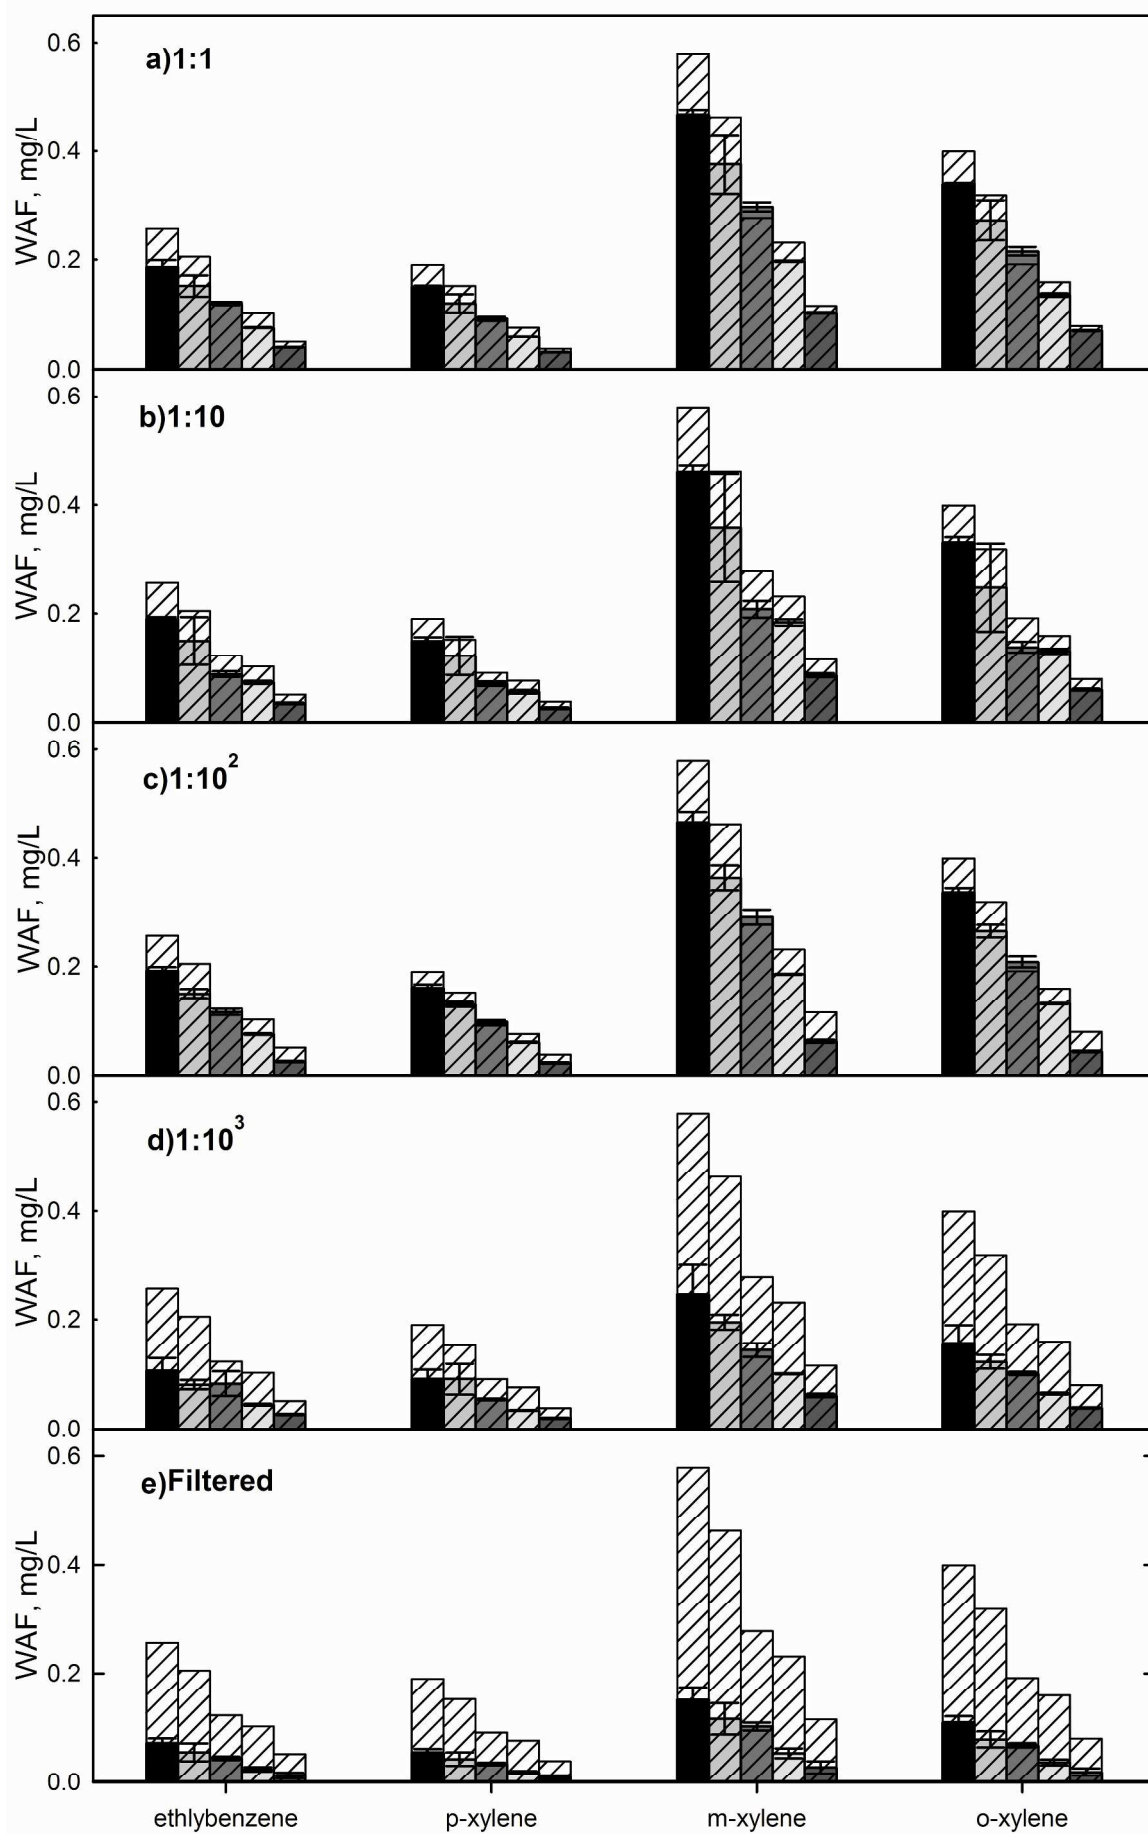

Figure S 3 Target aromatic compounds WAF concentrations in B0 (■), B20 (▤), B40 (▥), B60 (▦), B80 (▧), and  $S_{aq,WAF}^{sat}$  is aromatic compounds concentrations calculated by Equation 1 using solubilities reported by Sanemasa et al.<sup>3</sup> (▨) at dilution levels: (a) 1:10<sup>0</sup>, (b) 1:10<sup>1</sup>, (c) 1:10<sup>2</sup>, (d) 1:10<sup>3</sup>, (e) and 1:10<sup>3</sup> filtered. Means and standard deviations are calculated arithmetically (n=3). Error bars are ± 1 arithmetic standard deviation.

Table S1. Reported aqueous solubility of pure selected hydrocarbons in deionized water at room temperature (22 ± 1 °C)

| Compound                    | Pure solubility @ room temperature (µg/L) | Reference |
|-----------------------------|-------------------------------------------|-----------|
| <b><u>n-alkanes</u></b>     |                                           |           |
| C10                         | 26                                        | 1         |
| C16                         | 6                                         | 1         |
| <b><u>FAMEs</u></b>         |                                           |           |
| C16:0                       | 4                                         | 2         |
| C18:0                       | 0.3                                       | 2         |
| C18:1                       | 4.39                                      | 2         |
| C18:2                       | 21                                        | 2         |
| C18:3                       | 91.85                                     | 2         |
| <b><u>mono-aromatic</u></b> |                                           |           |
| benzene                     | 1,780,000 (or 1.78g/L)                    | 4         |
| toluene                     | 563,000                                   | 5         |
| ethylbenzene                | 187,000                                   | 6         |
| p-xylene                    | 153,000                                   | 6         |
| m-xylene                    | 159,000                                   | 6         |
| o-xylene                    | 212,000                                   | 6         |

| <b>PAHs</b>  |        |   |
|--------------|--------|---|
| Naphthalene  | 30,618 | 7 |
| Fluorene     | 1,685  | 8 |
| phenanthrene | 994    | 8 |

## References

1. Franks, F., Solute-Water Interactions and the Solubility Behaviour of Long-chain Paraffin Hydrocarbons. *Nature* **1966**, 210, (5031), 87-88.
2. Krop, H. B.; van Velzen, M. J. M.; Parsons, J. R.; Govers, H. A. J., n-Octanol-water partition coefficients, aqueous solubilities and Henry's law constants of fatty acid esters. *Chemosphere* **1997**, 34, (1), 107-119.
3. Sanemasa, I.; Araki, M.; Deguchi, T.; Nagai, H., Solubility measurements of benzene and the alkylbenzenes in water by making use of solute vapor. *Bulletin of the Chemical Society of Japan* **1982**, 55, (4), 1054-1062.
4. Goral, M., IUPAC-NIST solubility data series. 81. Hydrocarbons with water and seawater - Revised and updated. Part 2. Benzene with water and heavy water. *Journal of physical and chemical reference data* **2005**, 34, (2), 477-552.
5. Goral, M., IUPAC-NIST solubility data series. 81. Hydrocarbons with water and seawater-revised and updated. Part 5. C7 hydrocarbons with water and heavy water. *Journal of physical and chemical reference data* **2005**, 34, (3), 1399-1487.
6. Goral, M., IUPAC-NIST solubility data series. 81. Hydrocarbons with water and seawater - Revised and updated. Part 6. C8H8-C8H 10 hydrocarbons with water. *Journal of physical and chemical reference data* **2005**, 34, (3), 1489-1553.
7. Goral, M., IUPAC-NIST solubility data series. 81. Hydrocarbons with water and seawater - Revised and updated. Part 9. C10 hydrocarbons with water. *Journal of physical and chemical reference data* **2006**, 35, (1), 93-151.
8. Goral, M., IUPAC-NIST solubility data series. 81. Hydrocarbons with water and seawater - Revised and updated. Part 11. C13-C36 hydrocarbons with water. *Journal of physical and chemical reference data* **2006**, 35, (2), 687-784.
